# Supplementary material for: JNK1 Deficient Insulin-Producing Cells Are Protected against Interleukin-1β-Induced Apoptosis Associated with Abrogated Myc Expression
Source: PubMed Central journal article supplement (PMC4745310; doi:10.1155/2016/1312705), 2016-01-10
Supplement: 1312705.f1.pdf [file 1312705.f1.pdf]

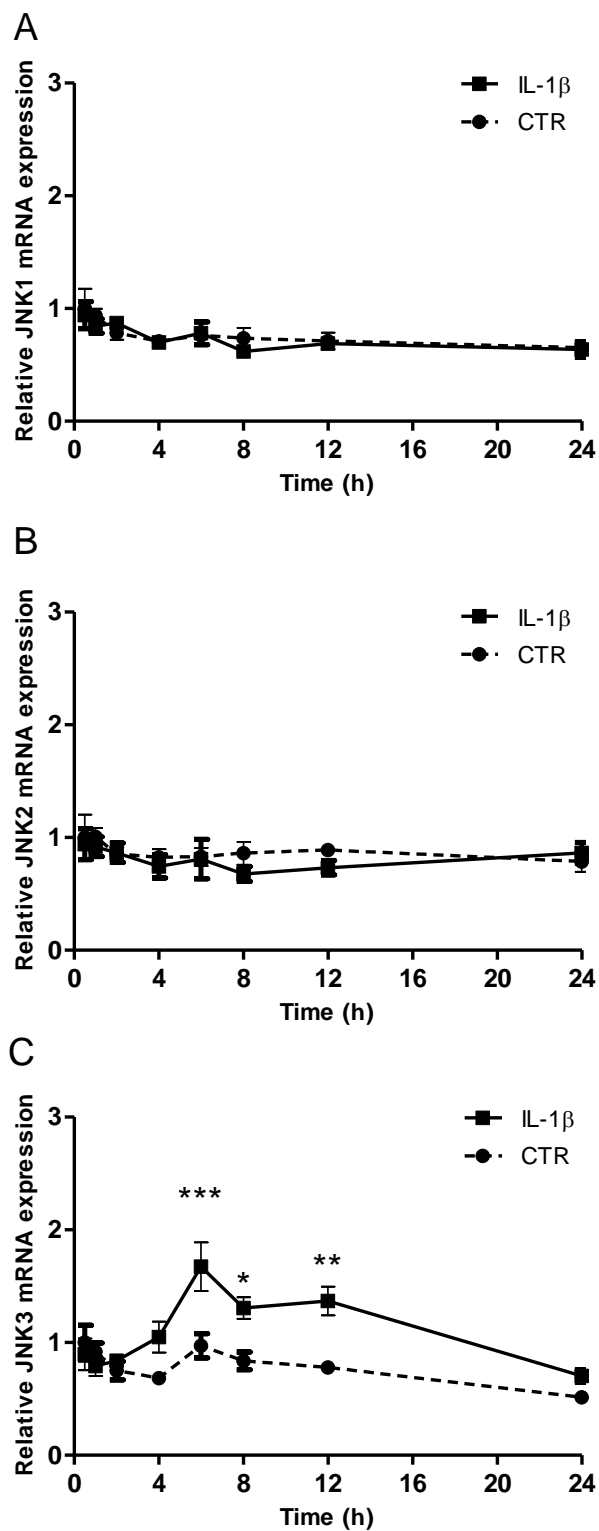

**Supplementary figure 1. JNK subtype expression and regulation by IL-1 $\beta$  in INS-1 cell.** INS-1 cells were exposed to 150 pg/ml IL-1 $\beta$  (square) or vehicle (circle) for 2 to 24 h. Relative mRNA of the JNK subtypes were measured using quantitative RT-PCR and normalized to the average of 18S and hprt1. A: Relative JNK1 subtype mRNA expression, B: Relative JNK2 subtype mRNA expression, C: Relative JNK3 subtype. Data are shown with  $\pm$  SEM of n=4 independent experiments. \*P<0.05, \*\* P<0.01, \*\*\* P<0.001.

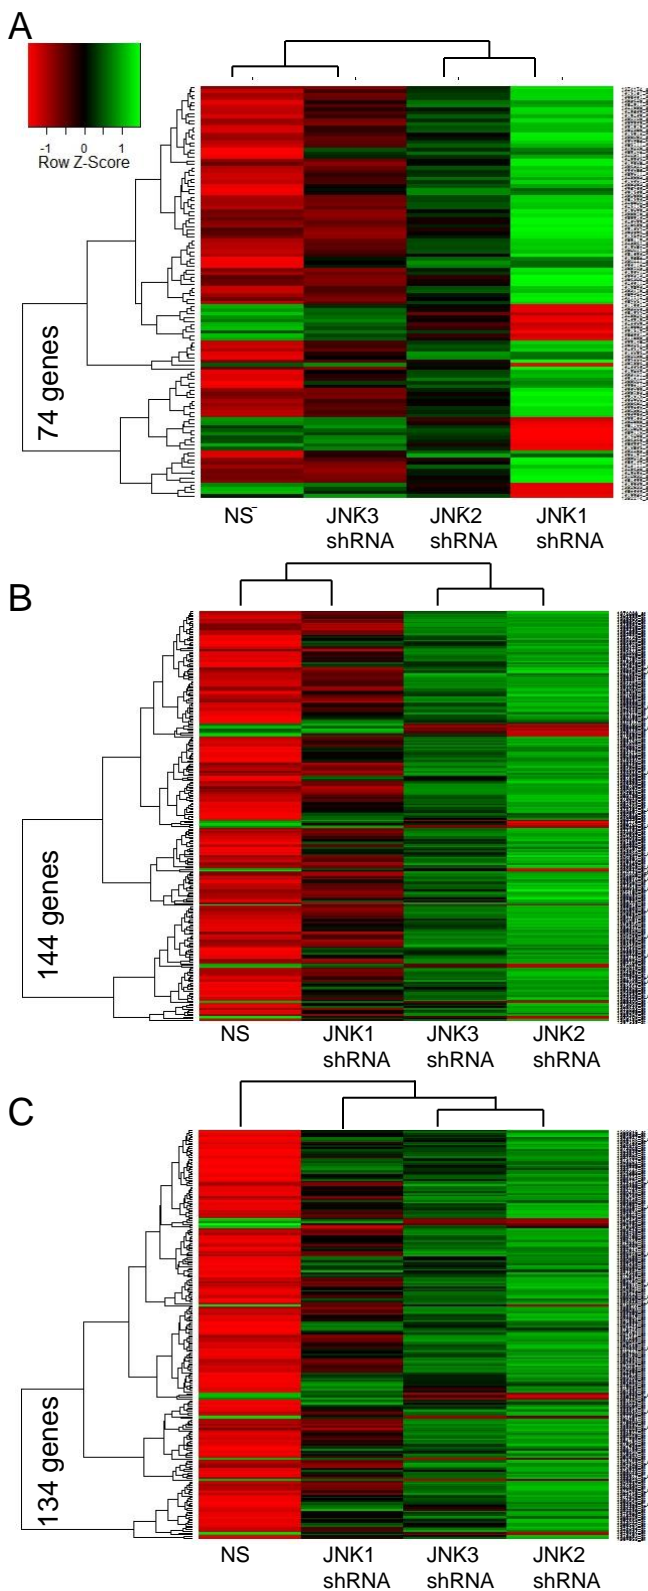

**Supplementary figure 2. JNK subtypes differentially regulate INS-1 cell gene expression.** Stable INS-1 cell lines expressing shRNA for JNK1, JNK2, JNK3 or non-sense shRNA were exposed to 150 pg/ml IL-1 $\beta$  for 45 min. mRNA expression was analyzed by microarray analysis. The heat-plot panels show clusters based on the mean log<sub>2</sub> expression values on the y-axis for each significant probe of three independent experiments. The significantly regulated probes were selected by the following criteria: log<sub>2</sub> fold change > 1 or log<sub>2</sub> fold change < -1 and P-value < 0.05. A: JNK1 vs. NS 0 - 45 min. B: JNK2 vs. NS 0 - 45 min. C: JNK3 vs. NS 0 - 45 min.

| ID           | logFC        | AveExpr     | t            | P.Value     | adj.P.Val   | B            | Diff JNK1 genes | Fold Change  |
|--------------|--------------|-------------|--------------|-------------|-------------|--------------|-----------------|--------------|
| 1370932_at   | 2,807600249  | 4,543519299 | 2,066925593  | 0,048227764 | 0,871062203 | -4,321179758 | Lrp4            | 7,001190433  |
| 1397304_at   | 2,588518358  | 7,545268918 | 2,301586117  | 0,029117685 | 0,871062203 | -4,242587108 | Igtp            | 6,014806634  |
| 1371951_at   | 2,224031123  | 8,927565744 | 2,517698938  | 0,017897953 | 0,871062203 | -4,167191584 | Fhl2            | 4,671970365  |
| 1369313_at   | 2,209742168  | 8,140463561 | 2,500803041  | 0,018605166 | 0,871062203 | -4,173170901 | Fhl2            | 4,625925937  |
| 1378739_at   | 2,075039328  | 7,156827251 | 2,472032701  | 0,019868998 | 0,871062203 | -4,183322254 | Gidc            | 4,413559003  |
| 1375066_at   | 2,030431841  | 7,935829401 | 2,145521969  | 0,04084802  | 0,871062203 | -4,2952977   | RGD1563319      | 4,085271162  |
| 1381014_at   | 1,962081771  | 5,821921042 | 2,183157968  | 0,037685271 | 0,871062203 | -4,282739425 | Ifi44           | 3,896237904  |
| 1383564_at   | 1,949158848  | 7,676327564 | 2,057576079  | 0,049180009 | 0,871062203 | -4,324226202 | Irf7            | 3,861493246  |
| 1376501_at   | 1,903132595  | 8,350255033 | 2,209716912  | 0,035587473 | 0,871062203 | -4,273816535 | Arhgap8         | 3,740244534  |
| 1396163_at   | 1,860009487  | 5,812309399 | 2,087987053  | 0,046142291 | 0,871062203 | -4,314291355 | Igtp            | 3,630100492  |
| 1391463_at   | 1,77393993   | 7,518710746 | 2,149225219  | 0,040526612 | 0,871062203 | -4,294066594 | Ddx58           | 3,419866315  |
| 1374718_at   | 1,750045726  | 7,431761314 | 2,378970257  | 0,024517421 | 0,871062203 | -4,215877505 | Dtx3l           | 3,363692271  |
| 1385426_at   | 1,74116007   | 7,09628337  | 2,5472419    | 0,016720751 | 0,871062203 | -4,156706307 | Ccdc109b        | 3,343083731  |
| 1374452_at   | 1,721788378  | 7,297897568 | 2,104276974  | 0,044584619 | 0,871062203 | -4,308939485 | Pde9a           | 3,298450326  |
| 1369153_at   | 1,582719405  | 5,587450632 | 2,16901538   | 0,038847046 | 0,871062203 | -4,287470515 | Nphs1           | 2,995392399  |
| 1379663_at   | 1,545606423  | 7,795924846 | 2,296627178  | 0,029437657 | 0,871062203 | -4,244286593 | Cachd1          | 2,919267517  |
| 1398217_at   | 1,502619554  | 6,065479288 | 3,352827512  | 0,002332805 | 0,871062203 | -3,862549056 | Zbtb41          | 2,833567468  |
| 1390698_at   | 1,446867654  | 7,585271522 | 2,350695319  | 0,026115309 | 0,871062203 | -4,225676994 | Mapkip1l        | 2,726155119  |
| 1376066_at   | 1,444511508  | 7,43329031  | 2,162103489  | 0,039426431 | 0,871062203 | -4,289777499 | Rnd3            | 2,721706516  |
| 1377698_at   | 1,432881187  | 6,767088634 | 2,190628019  | 0,037084293 | 0,871062203 | -4,28023474  | Cd40            | 2,699853614  |
| 1368813_at   | 1,411724171  | 7,532551488 | 2,088924843  | 0,046051324 | 0,871062203 | -4,313983819 | Cebpd           | 2,660549363  |
| 1375941_at   | 1,398490276  | 8,461744869 | 2,079816552  | 0,046941625 | 0,871062203 | -4,316967815 | Baiap2l1        | 2,636255079  |
| 1372111_at   | 1,374944911  | 4,474841359 | 2,622047571  | 0,01405314  | 0,871062203 | -4,129996107 | Cav1            | 2,593580032  |
| 1379458_at   | 1,333805222  | 4,247982918 | 2,136455196  | 0,041644569 | 0,871062203 | -4,298307551 | Klhl14          | 2,520666445  |
| 1369105_a_at | 1,312150221  | 8,459135664 | 2,180253369  | 0,037921301 | 0,871062203 | -4,283712261 | Pkib            | 2,483113525  |
| 1383247_a_at | 1,301953506  | 9,698403711 | 2,454513886  | 0,02067681  | 0,871062203 | -4,189484299 | Spns2           | 2,46562519   |
| 1396250_at   | 1,295919845  | 5,703022287 | 2,846911904  | 0,008231589 | 0,871062203 | -4,04858723  | Coro1c          | 2,425334947  |
| 1382791_at   | 1,276702579  | 4,700106143 | 2,318941253  | 0,028022561 | 0,871062203 | -4,236627497 | Zfp617          | 2,455485784  |
| 1372064_at   | 1,263820434  | 9,429614879 | 2,222608745  | 0,034607563 | 0,871062203 | -4,269467734 | Cxcl16          | 2,401307956  |
| 1398393_at   | 1,25540626   | 7,594048504 | 2,497392106  | 0,01875103  | 0,871062203 | -4,17376431  | Mapk11          | 2,387343663  |
| 1370307_at   | 1,251121258  | 7,549983008 | 2,134740442  | 0,041796766 | 0,871062203 | -4,2988761   | Agrn            | 2,380263444  |
| 1398482_at   | 1,251046101  | 5,576727556 | 2,062637815  | 0,048662426 | 0,871062203 | -4,322577767 | Bcl3            | 2,380139448  |
| 1393701_at   | 1,226337981  | 6,361331212 | 3,118522165  | 0,004220026 | 0,871062203 | -3,944883286 | Dbr1            | 2,339723392  |
| 1374157_at   | 1,218970326  | 7,333225946 | 2,065188916  | 0,048403399 | 0,871062203 | -4,321746172 | Pde4b           | 2,327805189  |
| 1387459_at   | 1,217336965  | 7,860843148 | 2,129998551  | 0,042220234 | 0,871062203 | -4,300447183 | Pkib            | 2,325171233  |
| 1380583_s_at | 1,20431706   | 6,70407403  | 2,175691026  | 0,038294718 | 0,871062203 | -4,28523911  | Csf1            | 2,304281639  |
| 1384202_at   | 1,194106548  | 9,693378665 | 2,158211808  | 0,039756042 | 0,871062203 | -4,2910749   | Tesc            | 2,288030919  |
| 1391211_at   | 1,178100778  | 6,20029422  | 2,400621943  | 0,023354783 | 0,871062203 | -4,208343595 | Atp11c          | 2,262786985  |
| 1378634_at   | 1,175960425  | 6,173924393 | 3,407564362  | 0,00202729  | 0,871062203 | -3,844217505 | Hdac8           | 2,259432449  |
| 1390777_at   | 1,168949082  | 8,202655986 | 2,520307311  | 0,017791014 | 0,871062203 | -4,166267363 | Sc5dl           | 2,248478489  |
| 1373416_at   | 1,167462698  | 9,471749592 | 2,302698451  | 0,029046347 | 0,871062203 | -4,242205691 | Fndc3b          | 2,246163113  |
| 1391871_at   | 1,159536215  | 7,159140231 | 2,115626323  | 0,043527201 | 0,871062203 | -4,305189596 | Stard13         | 2,233856064  |
| 1389351_at   | 1,144804608  | 7,048078123 | 2,352969392  | 0,025983367 | 0,871062203 | -4,224890522 | Lrrrip1         | 2,211618187  |
| 1379538_at   | 1,141713588  | 7,078519549 | 2,336112116  | 0,026976041 | 0,871062203 | -4,230713402 | Cenpj           | 2,206429403  |
| 1378592_at   | 1,132001427  | 8,584816439 | 2,12154803   | 0,042984393 | 0,871062203 | -4,303242802 | Trim59          | 2,1916257    |
| 1371171_at   | 1,11658837   | 8,63292337  | 2,154713294  | 0,040054456 | 0,871062203 | -4,292240283 | RT1-EC2         | 2,168336059  |
| 1393085_at   | 1,083435665  | 7,847167842 | 2,508290633  | 0,018286634 | 0,871062203 | -4,170522694 | Mitd1           | 2,119076491  |
| 1368618_at   | 1,079331406  | 7,477657814 | 2,23737425   | 0,033515147 | 0,871062203 | -4,264473068 | Grb14           | 2,113056592  |
| 1388015_at   | 1,064707454  | 4,572536585 | 2,267953986  | 0,031351101 | 0,871062203 | -4,254083162 | Ptprz1          | 2,091745678  |
| 1384177_at   | 1,05217584   | 6,66157579  | 2,35103959   | 0,026095295 | 0,871062203 | -4,22555795  | Gramd3          | 2,07365493   |
| 1389007_at   | 1,050419377  | 6,095644772 | 2,691702341  | 0,011930505 | 0,871062203 | -4,104939627 | Fam189a2        | 2,071131817  |
| 1367593_at   | 1,045188681  | 8,484985511 | 2,246999819  | 0,032819855 | 0,871062203 | -4,26120924  | Sepw1           | 2,063636231  |
| 1370517_at   | 1,04114195   | 7,025983949 | 2,243707468  | 0,033056195 | 0,871062203 | -4,262326296 | Nptx1           | 2,057855883  |
| 1398062_at   | 1,020453631  | 6,751716534 | 2,881768082  | 0,00756484  | 0,871062203 | -4,035852806 | Smap2           | 2,028556704  |
| 1380071_at   | 1,019873541  | 8,428923589 | 2,154333487  | 0,040086973 | 0,871062203 | -4,292366745 | Parp12          | 2,02774121   |
| 1385455_at   | 1,018822047  | 7,488223846 | 2,959792884  | 0,006252751 | 0,871062203 | -4,107267758 | Prpf38b         | 2,02626385   |
| 1382058_at   | 1,015102152  | 9,498439684 | 2,668051039  | 0,012615179 | 0,871062203 | -4,113466037 | Rras2           | 2,02104599   |
| 1385089_at   | 1,005352738  | 5,663036597 | 2,218256799  | 0,034935604 | 0,871062203 | -4,270937043 | Grhl1           | 2,007434253  |
| 1374872_at   | 1,001553335  | 6,762582056 | 3,114794232  | 0,004259526 | 0,871062203 | -3,950256741 | Rasgrp2         | 2,002154539  |
| 1398710_at   | -1,004506999 | 5,696830485 | -2,303212586 | 0,029013428 | 0,871062203 | -4,24202937  | Cyp2u1          | 0,498440431  |
| 1383205_at   | -1,005306922 | 8,596559648 | -2,19639355  | 0,036626345 | 0,871062203 | -4,278298888 | Dact2           | 0,49816414   |
| 1378632_at   | -1,009434721 | 4,54145432  | -2,165869155 | 0,039109824 | 0,871062203 | -4,288521061 | Ppfia4          | 0,496740843  |
| 1373345_at   | -1,014515696 | 9,53211725  | -2,161945501 | 0,039439764 | 0,871062203 | -4,28983019  | Amigo2          | 0,494994467  |
| 1382868_at   | -1,016608087 | 5,602274314 | -2,18196518  | 0,037782038 | 0,871062203 | -4,283138998 | Sema6a          | 0,494277079  |
| 1377899_at   | -1,017435223 | 6,921735479 | -2,119683254 | 0,043154671 | 0,871062203 | -4,30385898  | RGD1304982      | 0,493993778  |
| 1391944_at   | -1,071182103 | 8,47457317  | -2,09114424  | 0,045836671 | 0,871062203 | -4,313255721 | Fam184a-ps1     | 0,475928877  |
| 1387476_at   | -1,234070448 | 7,224494546 | -2,570786896 | 0,015834327 | 0,871062203 | -4,148323322 | Kend2           | 0,4252116321 |
| 1379863_at   | -1,251567644 | 7,314776614 | -2,432257409 | 0,021746613 | 0,871062203 | -4,197290906 | Kend2           | 0,419991593  |
| 1383654_a_at | -1,254684628 | 6,284159459 | -2,277845861 | 0,030678624 | 0,871062203 | -4,250709325 | Fnk3            | 0,419085169  |
| 1387702_at   | -1,286644494 | 5,417845115 | -2,394074305 | 0,023700939 | 0,871062203 | -4,210624587 | Gair1           | 0,409039299  |
| 1379824_at   | -1,424720775 | 8,440864474 | -2,131131627 | 0,0421187   | 0,871062203 | -4,300071926 | Tox             | 0,372491452  |
| 1370834_at   | -1,457628144 | 6,821901903 | -2,122404463 | 0,04290639  | 0,871062203 | -4,302959721 | H3st31          | 0,364091122  |
| 1383531_at   | -1,565233954 | 7,314497736 | -2,232938473 | 0,033840011 | 0,871062203 | -4,265975076 | Crebrf          | 0,337922905  |
| 1370606_at   | -2,054370886 | 5,987699874 | -2,177335528 | 0,038159741 | 0,871062203 | -4,284688926 | P2ry1           | 0,240753573  |

**Supplementary table 1:** List of normalized gene expression profile of the 45 min IL-1 $\beta$  exposed JNK1 knockdown (KD) INS-1 cells, subtracted the gene expression pattern in IL-1 $\beta$  non-exposed JNK1 KD INS-1 cells to gene expression profile of 45 min IL-1 $\beta$  exposed NS INS-1 cells subtracted the gene expression pattern in the IL-1 $\beta$  non-exposed NS INS-1 cells.

| ID           | logFC       | AveExpr     | t           | P.Value     | adj.P.Val   | B            | Diff JNK2 genes | Fold Change |
|--------------|-------------|-------------|-------------|-------------|-------------|--------------|-----------------|-------------|
| 1375877_at   | 2,643791349 | 8,624173612 | 2,705768019 | 0,011539958 | 0,325371531 | -2,740685564 | Syt4            | 6,249719104 |
| 1384971_at   | 2,62847873  | 5,221109076 | 2,670343861 | 0,012547233 | 0,325488805 | -2,803814642 | Depdc7          | 6,183736006 |
| 1382215_at   | 2,216028514 | 5,697247148 | 2,859134935 | 0,007991704 | 0,312106427 | -2,462735138 | RGD1562997      | 4,646126756 |
| 1386965_at   | 2,101927461 | 7,330710513 | 2,332464564 | 0,027195328 | 0,367888461 | -3,382830505 | Lpl             | 4,292825297 |
| 1391573_at   | 2,005235661 | 7,474612044 | 2,28786338  | 0,030010944 | 0,371620236 | -3,455816295 | Tnfrsf21        | 4,014542708 |
| 1393174_at   | 1,993177804 | 6,604301672 | 2,202512125 | 0,03614521  | 0,380176208 | -3,592994792 | Fam171b         | 3,98112951  |
| 1393584_at   | 1,965596687 | 7,547521036 | 2,092278087 | 0,045727353 | 0,393646739 | -3,765146623 | Tnfrsf21        | 3,905742092 |
| 1377089_a_at | 1,788816945 | 9,475484708 | 2,736930018 | 0,010716932 | 0,319239334 | -2,684808828 | Tspan5          | 3,455314298 |
| 1373223_at   | 1,781603929 | 8,069094044 | 2,306156207 | 0,028825601 | 0,370449471 | -3,425986918 | Fam171b         | 3,43808194  |
| 1378362_at   | 1,768362154 | 5,783758686 | 3,693764961 | 0,000963528 | 0,312106427 | -0,852419991 | C1ql3           | 3,406669886 |
| 1389199_at   | 1,759144264 | 7,164240328 | 3,829024192 | 0,000674576 | 0,312106427 | -0,58141666  | RGD1309079      | 3,384972854 |
| 1380443_at   | 1,738687537 | 7,265679744 | 2,772463345 | 0,009845707 | 0,316103167 | -2,620712328 | Pwp1            | 3,337314241 |
| 1389666_at   | 1,682001941 | 6,611173328 | 2,574363413 | 0,015703553 | 0,33532806  | -2,972684713 | Rom1            | 3,208728982 |
| 1374245_at   | 1,668749024 | 5,731721321 | 2,098951322 | 0,045088644 | 0,392870811 | -3,754893882 | Nhej1           | 3,179387859 |
| 1379612_at   | 1,664423737 | 8,157389092 | 2,798963537 | 0,009239756 | 0,314059443 | -2,57265213  | Mapk8           | 3,169870137 |
| 1391045_at   | 1,587841949 | 6,79394251  | 2,498761707 | 0,018692335 | 0,345082347 | -3,103343492 | Dgat2           | 3,005993624 |
| 1393612_a_at | 1,577492285 | 4,271547706 | 2,679048047 | 0,012292389 | 0,325371531 | -2,788342045 | Depdc7          | 2,98450627  |
| 1387459_at   | 1,57570672  | 7,860843178 | 2,757045196 | 0,010215238 | 0,316103167 | -2,648573469 | Pkib            | 2,980814754 |
| 1387818_at   | 1,567005495 | 5,319457387 | 2,093601314 | 0,045600069 | 0,393579635 | -3,763115376 | Casp4           | 2,962890882 |
| 1383257_at   | 1,565233414 | 3,877720865 | 2,356636096 | 0,025719104 | 0,364702336 | -3,34291653  | Rbfox1          | 2,959253759 |
| 1384147_at   | 1,55574593  | 8,229598231 | 2,51554708  | 0,017986623 | 0,344696449 | -3,074520289 | Eif1a           | 2,939856896 |
| 1369105_a_at | 1,550658785 | 8,459135664 | 2,576556392 | 0,015623865 | 0,33532806  | -2,968862991 | Pkib            | 2,929508803 |
| 1370781_a_at | 1,54777685  | 8,240116555 | 2,60501675  | 0,014623143 | 0,332839955 | -2,919106908 | Kcnip1          | 2,923662642 |
| 1384882_at   | 1,544900618 | 8,151551996 | 2,539366155 | 0,017027368 | 0,34097497  | -3,033435209 | Hectd2          | 2,917839682 |
| 1383736_at   | 1,525479    | 7,36121149  | 2,731371265 | 0,010859594 | 0,321029013 | -2,69479942  | Elavl2          | 2,878822822 |
| 1390458_at   | 1,515608273 | 5,430770545 | 2,269289456 | 0,03125954  | 0,373363202 | -3,485952416 | LOC100362458    | 2,859193526 |
| 1394316_a_at | 1,499877158 | 8,581619759 | 2,431947607 | 0,021761857 | 0,355220726 | -3,216985247 | Tspan5          | 2,828186301 |
| 1393220_at   | 1,488734418 | 6,261976799 | 2,645885322 | 0,013289982 | 0,325488805 | -2,84715391  | Armc8           | 2,806426776 |
| 1377163_at   | 1,480988151 | 5,220833343 | 2,460233892 | 0,020409792 | 0,348984246 | -3,169098292 | Inhbb           | 2,791398603 |
| 1383326_a_at | 1,476212758 | 9,288416461 | 2,922164566 | 0,006856166 | 0,312106427 | -2,346467868 | Pdcd4           | 2,782172109 |
| 1390698_at   | 1,388185668 | 7,585271522 | 2,255355936 | 0,03222685  | 0,374779711 | -3,508458147 | Mapk1ip1l       | 2,617492981 |
| 1392818_at   | 1,383991316 | 9,466796717 | 3,12509542  | 0,004151229 | 0,312106427 | -1,965011978 | Gas5            | 2,609894186 |
| 1394567_at   | 1,36435125  | 9,39057544  | 2,672385716 | 0,012487012 | 0,325488805 | -2,800187335 | Osox2           | 2,574605253 |
| 1387662_at   | 1,362862133 | 5,462116709 | 2,291248479 | 0,029788317 | 0,37099995  | -3,450307474 | Syt4            | 2,571949174 |
| 1393707_at   | 1,348396054 | 8,765270368 | 2,654088448 | 0,013036419 | 0,325488805 | -2,832641282 | Bcl2l2          | 2,546288791 |
| 1377474_at   | 1,334275748 | 7,079784239 | 2,475221378 | 0,019725127 | 0,346650297 | -3,143582841 | Abhd13          | 2,521448868 |
| 1379314_at   | 1,327803281 | 8,907352521 | 2,379406372 | 0,02449349  | 0,362787914 | -3,305089757 | Ppp3cb          | 2,51020168  |
| 1387116_at   | 1,32159313  | 9,51497028  | 2,540115336 | 0,016997979 | 0,340605766 | -3,032139496 | Dnajb9          | 2,499419617 |
| 1392211_at   | 1,321551789 | 7,3802041   | 3,008605691 | 0,005544986 | 0,312106427 | -2,185248359 | Sec24b          | 2,499347997 |
| 1384217_at   | 1,303100972 | 4,967328833 | 2,622749193 | 0,014030106 | 0,330888695 | -2,887959421 | Zhx2            | 2,467587035 |
| 1382186_a_at | 1,287705424 | 6,753997629 | 2,232433344 | 0,03877185  | 0,377010577 | -3,545292039 | Gpatch4         | 2,441394479 |
| 1388628_at   | 1,287241341 | 9,783203001 | 2,140862701 | 0,041255637 | 0,388299247 | -3,690000759 | Tmed3           | 2,440609263 |
| 1383768_at   | 1,285238697 | 7,276327115 | 2,413910396 | 0,022666445 | 0,357055571 | -3,247358736 | Elavl2          | 2,437223738 |
| 1397886_at   | 1,283667022 | 6,792319495 | 2,54240298  | 0,01698528  | 0,340290174 | -3,0281817   | Zc3h8           | 2,434570068 |
| 1388928_at   | 1,275060555 | 6,087069803 | 2,77615436  | 0,009759125 | 0,316103167 | -2,614031452 | Cfl2            | 2,420089756 |
| 1387112_at   | 1,266922799 | 6,047872504 | 2,55904783  | 0,016270689 | 0,336254768 | -2,999326193 | Plp1            | 2,406477274 |
| 1384202_at   | 1,260034291 | 9,69378665  | 2,277368707 | 0,03071076  | 0,371918382 | -3,47286275  | Tesc            | 2,395014334 |
| 1372440_at   | 1,258327442 | 8,259707802 | 2,59126836  | 0,015098886 | 0,335200918 | -2,943179136 | Serpine2        | 2,392182475 |
| 1393952_at   | 1,248824615 | 6,62938367  | 2,12323459  | 0,042830904 | 0,390676059 | -3,717399718 | Ccdc68          | 2,37647729  |
| 1373350_at   | 1,240777577 | 7,693985858 | 2,716876896 | 0,011239998 | 0,323959878 | -2,720802578 | Psip1           | 2,363259013 |
| 1377461_at   | 1,233886595 | 5,659086047 | 2,377463132 | 0,024600287 | 0,362787914 | -3,308326433 | LOC100911534    | 2,351963688 |
| 1369886_a_at | 1,225524964 | 5,843883686 | 2,18752668  | 0,037332749 | 0,382777575 | -3,616750975 | Cabp1           | 2,338405234 |
| 1379567_at   | 1,221015256 | 5,421590526 | 3,137336256 | 0,004025964 | 0,312106427 | -1,941684705 | Med13           | 2,331107047 |
| 1398582_at   | 1,213178135 | 5,850485662 | 2,537809655 | 0,017088578 | 0,341980495 | -3,036126515 | Rps6ka5         | 2,318478157 |
| 1369679_a_at | 1,21118577  | 5,499056454 | 3,139761784 | 0,004001576 | 0,312106427 | -1,937058411 | Nfia            | 2,315278543 |
| 1388661_at   | 1,202541755 | 6,717107755 | 2,803425177 | 0,009141252 | 0,314059443 | -2,564539303 | Mtfd1           | 2,301447856 |
| 1383327_at   | 1,202330167 | 8,808104799 | 2,81513426  | 0,008887421 | 0,312106427 | -2,543219242 | Pdcd4           | 2,301110345 |
| 1395519_at   | 1,198662868 | 6,249956247 | 2,313674563 | 0,028350872 | 0,369397265 | -3,413684462 | MGC95152        | 2,295268401 |
| 1396233_at   | 1,195914937 | 5,652966525 | 2,137851043 | 0,041521042 | 0,388657555 | -3,694692387 | Arsk            | 2,290900718 |
| 1381144_at   | 1,194587064 | 6,929857964 | 2,62418362  | 0,013983126 | 0,33080261  | -2,885434951 | Impad1          | 2,288793116 |
| 1379027_at   | 1,191493604 | 7,620515633 | 2,549435967 | 0,016636247 | 0,339020628 | -3,016001875 | Wwc1            | 2,283890691 |
| 1387521_at   | 1,183949513 | 9,125036282 | 2,740654943 | 0,010622319 | 0,318788805 | -2,678108548 | Pdcd4           | 2,27197902  |
| 1368053_at   | 1,181228558 | 6,607378336 | 2,57773004  | 0,015581371 | 0,33532806  | -2,966816945 | Pard3           | 2,267698056 |
| 1381895_at   | 1,179695085 | 5,955836855 | 2,301441881 | 0,029126947 | 0,370449471 | -3,43368846  | Nrf1            | 2,265288949 |
| 1380619_at   | 1,174745174 | 7,876912251 | 2,595739037 | 0,01494263  | 0,333665403 | -2,935358816 | RGD1305537      | 2,257530022 |
| 1374400_at   | 1,16726108  | 9,120140554 | 3,167487111 | 0,003732662 | 0,312106427 | -1,884084661 | Efr3a           | 2,245849232 |
| 1385668_at   | 1,164213556 | 4,942913142 | 2,471152763 | 0,019908869 | 0,348422021 | -3,150515745 | LOC683460       | 2,241110146 |
| 1373249_at   | 1,160532266 | 8,573630544 | 2,75282593  | 0,010318691 | 0,316307086 | -2,656190752 | Ubl4a           | 2,23539885  |
| 1398706_at   | 1,158502694 | 7,486201775 | 2,648623622 | 0,013204833 | 0,325488805 | -2,842312006 | LOC100909675    | 2,23256319  |
| 1390272_at   | 1,158313613 | 7,145500347 | 2,359885925 | 0,025585796 | 0,364349955 | -3,337531173 | Dph5            | 2,231963776 |
| 1371038_at   | 1,157667741 | 6,055536915 | 2,168568    | 0,038884315 | 0,384284654 | -3,646636104 | Cebpg           | 2,230964785 |
| 1370517_at   | 1,157119826 | 7,025983949 | 2,493644977 | 0,018912486 | 0,345082347 | -3,112108209 | Nptx1           | 2,230117656 |
| 1377910_at   | 1,152124688 | 4,20058224  | 3,290933118 | 0,002731839 | 0,312106427 | -1,646272118 | Nop58           | 2,222409526 |
| 1373022_at   | 1,150686109 | 10,53779405 | 2,083860199 | 0,046544505 | 0,395825555 | -3,778042818 | Rab1a           | 2,220194561 |
| 1379825_at   | 1,1418937   | 9,141009922 | 2,658805264 | 0,012892671 | 0,325488805 | -2,824285997 | Poc1b           | 2,206704881 |
| 1388015_at   | 1,138270265 | 4,572356858 | 2,424651556 | 0,022123698 | 0,355421643 | -3,22928722  | Ptprz1          | 2,201169533 |
| 1382428_at   | 1,134681168 | 6,94372164  | 2,829391279 | 0,008587315 | 0,312106427 | -2,517039962 | Tasr1           | 2,195700329 |
| 1395455_at   | 1,13296149  | 9,033135941 | 2,824008952 | 0,008699472 | 0,312106427 | -2,527032454 | Hnrnp3          | 2,193084636 |

Supplementary table 2

|              |              |             |              |             |             |              |              |             |
|--------------|--------------|-------------|--------------|-------------|-------------|--------------|--------------|-------------|
| 1378081_at   | 1,127014836  | 6,355723561 | 2,942993368  | 0,006515585 | 0,312106427 | -2,307802423 | LOC100912462 | 2,184063552 |
| 1382079_at   | 1,118904726  | 6,739792252 | 2,158909315  | 0,039696785 | 0,386031992 | -3,661795747 | Mapk8        | 2,171820283 |
| 1385158_at   | 1,112942523  | 8,32206773  | 2,495858382  | 0,018816961 | 0,345082347 | -3,108317991 | Chmp1b       | 2,162863357 |
| 1392043_at   | 1,112009258  | 6,667052389 | 2,314645147  | 0,028290107 | 0,36935098  | -3,412094475 | Insr         | 2,161464675 |
| 1389747_at   | 1,111686572  | 7,256282164 | 2,718261455  | 0,011203129 | 0,323496839 | -2,718321614 | Slc26a8      | 2,160981277 |
| 1374598_at   | 1,106753356  | 7,703404345 | 2,168694593  | 0,038873766 | 0,384284654 | -3,646437116 | Mapk8        | 2,15360454  |
| 1398300_at   | 1,102709231  | 9,183934433 | 2,241444103  | 0,03321956  | 0,37576696  | -3,530841345 | Atp1b3       | 2,147576065 |
| 1371094_at   | 1,100893689  | 6,812404016 | 3,048521596  | 0,005023543 | 0,312106427 | -2,110152002 | Lhx2         | 2,144875174 |
| 1398424_at   | 1,094454748  | 10,30752563 | 2,827638959  | 0,00862368  | 0,312106427 | -2,520404767 | Wsb2         | 2,13532364  |
| 1381906_at   | 1,08995768   | 7,691931895 | 2,261457705  | 0,031799963 | 0,374779711 | -3,498613185 | Tpd52        | 2,12867921  |
| 1393251_at   | 1,089500433  | 9,503481764 | 2,219784764  | 0,034820111 | 0,379026195 | -3,565513967 | Ar10         | 2,128003366 |
| 1393613_at   | 1,085133396  | 8,246782226 | 2,876532572  | 0,007661623 | 0,312106427 | -2,430755489 | Zfp462       | 2,12157166  |
| 1383396_at   | 1,082773063  | 9,436116572 | 2,352074242  | 0,026035231 | 0,365693151 | -3,35046851  | Fndc3a       | 2,118103464 |
| 1395799_at   | 1,072107313  | 6,629097754 | 3,772752974  | 0,000782696 | 0,312106427 | -0,694362784 | Itsn2        | 2,102520205 |
| 1385009_at   | 1,071263653  | 6,156501992 | 2,080203587  | 0,046903485 | 0,396157383 | -3,783641572 | Nol8         | 2,101273062 |
| 1392953_at   | 1,06851983   | 7,442469159 | 2,165844815  | 0,039111863 | 0,384999329 | -3,650914741 | Ptpia        | 2,097280505 |
| 1385333_at   | 1,068500939  | 7,101584932 | 2,139388162  | 0,041385392 | 0,388577411 | -3,692298378 | Aatk         | 2,097253043 |
| 1383489_at   | 1,066468294  | 7,223051656 | 2,13618656   | 0,04166838  | 0,388657555 | -3,697283474 | Il6st        | 2,094300256 |
| 1389918_at   | 1,066380677  | 8,591880517 | 3,168325387  | 0,003724807 | 0,312106427 | -1,882480386 | LOC100360205 | 2,094173071 |
| 1382161_at   | 1,066122361  | 7,729757955 | 2,890019332  | 0,007414651 | 0,312106427 | -2,405904888 | Mphosph10    | 2,09379814  |
| 1382059_at   | 1,063295579  | 7,442062026 | 2,544762561  | 0,016816721 | 0,340017919 | -3,02409741  | Fbxo30       | 2,08969619  |
| 1391432_at   | 1,062540154  | 8,513508722 | 2,854524304  | 0,008081405 | 0,312106427 | -2,471195505 | Wdr75        | 2,088605695 |
| 1394435_at   | 1,057987672  | 8,564935315 | 2,222694336  | 0,034601139 | 0,379026195 | -3,560868805 | Vangl1       | 2,082025404 |
| 1385639_at   | 1,05685415   | 8,333683541 | 3,016005902  | 0,005444576 | 0,312106427 | -2,171355965 | Casp8ap2     | 2,080390205 |
| 1372133_at   | 1,05222829   | 10,2561388  | 2,415413626  | 0,02258976  | 0,357055571 | -3,244832446 | Rras2        | 2,07373032  |
| 1396315_at   | 1,046396573  | 7,190995457 | 3,140494456  | 0,003994237 | 0,312106427 | -1,935660701 | Ccdc112      | 2,065364728 |
| 1383403_at   | 1,046391213  | 9,287921134 | 3,543566597  | 0,001426429 | 0,312106427 | -1,151094649 | LOC678772    | 2,065357054 |
| 1377704_at   | 1,046241358  | 6,657752627 | 2,793578247  | 0,009359982 | 0,315028211 | -2,582436354 | Msl2         | 2,065142534 |
| 1374932_at   | 1,041200572  | 9,201785263 | 2,1273444    | 0,042458926 | 0,389884012 | -3,711025443 | LOC100361444 | 2,057939502 |
| 1376867_at   | 1,03913212   | 7,538660014 | 3,270318456  | 0,002878777 | 0,312106427 | -1,686196058 | Lgals1       | 2,054991064 |
| 1374541_at   | 1,034617441  | 8,108229866 | 2,266143344  | 0,031475628 | 0,374313973 | -3,491041714 | Gys1         | 2,048570355 |
| 1386910_a_at | 1,032123589  | 8,693441915 | 2,102842101  | 0,044719921 | 0,392311659 | -3,748905923 | Apex1        | 2,045032242 |
| 1374591_at   | 1,031897951  | 5,446892124 | 2,130668961  | 0,042160132 | 0,389000054 | -3,705863061 | Ptpkd        | 2,044712424 |
| 1372189_at   | 1,031361343  | 8,324955672 | 2,299862425  | 0,029228545 | 0,370449471 | -3,436266552 | Dnajc13      | 2,043952037 |
| 1391757_at   | 1,030895735  | 5,071105347 | 3,048426621  | 0,005024726 | 0,312106427 | -2,110331153 | Ptpn4        | 2,043292489 |
| 1389228_at   | 1,030706514  | 9,10210877  | 2,228037636  | 0,034202234 | 0,378112289 | -3,552328018 | Fam136a      | 2,043107537 |
| 1382210_at   | 1,025233769  | 5,832031642 | 3,295518622  | 0,002700151 | 0,312106427 | -1,637380542 | Rap2c        | 2,035289148 |
| 1397960_at   | 1,023478866  | 8,257789327 | 2,967472884  | 0,006135975 | 0,312106427 | -2,262210585 | Armcx3       | 2,032814916 |
| 1375846_at   | 1,02100461   | 7,66302997  | 2,333074268  | 0,027158561 | 0,367888461 | -3,38182671  | Xpr1         | 2,029331777 |
| 1367930_at   | 1,017835718  | 9,635420002 | 2,311595533  | 0,028481432 | 0,369866369 | -3,417088894 | Gap43        | 2,024879026 |
| 1378936_at   | 1,017497478  | 8,162094214 | 3,251099635  | 0,003022593 | 0,312106427 | -1,723342985 | Cstf2        | 2,024404367 |
| 1374793_at   | 1,0162056    | 8,204496023 | 2,636722274  | 0,013578647 | 0,327097086 | -2,863337246 | Wdr3         | 2,022592383 |
| 1381206_at   | 1,014518283  | 4,080406668 | 2,054738398  | 0,049472299 | 0,39921783  | -3,822407904 | Plcx2        | 2,020228225 |
| 1383328_x_at | 1,013878284  | 9,546021508 | 2,291486971  | 0,029772689 | 0,370999995 | -3,449919167 | Pdcd4        | 2,019332223 |
| 1368983_at   | 1,01252335   | 7,771746472 | 2,341167866  | 0,026674757 | 0,366693331 | -3,368487697 | Hbegf        | 2,017436619 |
| 1376174_at   | 1,011134526  | 5,370362158 | 2,38868721   | 0,023989253 | 0,360873145 | -3,289609729 | Serpina11    | 2,015495449 |
| 1383336_at   | 1,009706177  | 8,220510989 | 3,001825036  | 0,005638533 | 0,312106427 | -2,197965452 | Pnn          | 2,013500983 |
| 1378930_a_at | 1,006671209  | 6,942302175 | 2,250716184  | 0,032554911 | 0,374779711 | -3,51593295  | LOC100912518 | 2,009269675 |
| 1370773_a_at | 1,003043006  | 4,721161232 | -2,961639959 | 0,006224474 | 0,312106427 | -2,273088604 | Kcnip2       | 0,498946486 |
| 1398289_a_at | -1,047125872 | 7,028917145 | -2,508401911 | 0,018283967 | 0,344696449 | -3,086802892 | Crr1         | 0,4839129   |
| 1376224_at   | -1,060083784 | 6,47499032  | -2,608883285 | 0,014491879 | 0,332362059 | -2,91232476  | LOC100910536 | 0,479604206 |
| 1368146_at   | -1,0663904   | 10,58901567 | -3,196270512 | 0,003471843 | 0,312106427 | -1,828913525 | Dusp1        | 0,477512234 |
| 1386998_at   | -1,069165686 | 7,042623269 | -2,074219219 | 0,04749629  | 0,397386901 | -3,792781053 | Aldoc        | 0,476594535 |
| 1386754_at   | -1,092818705 | 8,123749323 | -2,192971911 | 0,036897504 | 0,381410234 | -3,608136156 | Trim14       | 0,468844461 |
| 1374404_at   | -1,114599667 | 6,013390843 | -2,275078507 | 0,030865428 | 0,372213976 | -3,476576197 | Jun          | 0,461819288 |
| 1373161_at   | -1,156092528 | 10,92635004 | -3,080460006 | 0,004640319 | 0,312106427 | -2,049783107 | Tmem98       | 0,448726245 |
| 1387776_at   | -1,178042376 | 7,296537955 | -2,084208678 | 0,046510421 | 0,395825555 | -3,777514886 | Tgm2         | 0,441950784 |
| 1367892_at   | -1,212612557 | 7,968016226 | -2,883200471 | 0,007538563 | 0,312106427 | -2,418475748 | Pdk2         | 0,431486535 |
| 1369788_s_at | -1,277282655 | 7,311762809 | -2,411091373 | 0,022810897 | 0,357287146 | -3,252093823 | Jun          | 0,412571865 |
| 1373043_at   | -1,345114276 | 9,746506739 | -3,055506362 | 0,004937239 | 0,312106427 | -2,096970658 | Sdf2l1       | 0,393622808 |
| 1387870_at   | -1,422137228 | 8,54191257  | -2,889375821 | 0,007426262 | 0,312106427 | -2,407091791 | Zfp36        | 0,3731591   |
| 1368147_at   | -1,473169265 | 7,182111156 | -3,549174623 | 0,00140579  | 0,312106427 | -1,139993026 | Dusp1        | 0,360190175 |
| 1370478_at   | -1,704752864 | 8,826179152 | -2,391041833 | 0,023862843 | 0,360073046 | -3,285676701 | Myo16        | 0,306773791 |
| 1379363_at   | -1,83736439  | 6,511229004 | -2,101822667 | 0,044816271 | 0,392603159 | -3,750475568 | LOC679818    | 0,279832534 |
| 1370490_at   | -1,903431257 | 6,25855324  | -2,326011407 | 0,027587262 | 0,368406744 | -3,393444088 | Pcdhb12      | 0,267306855 |
| 1370140_a_at | -2,243289604 | 4,905093357 | -2,671735574 | 0,012506157 | 0,325488805 | -2,80134245  | Pax4         | 0,211204195 |
| 1387981_at   | -2,350792289 | 6,285091041 | -2,450939043 | 0,020845316 | 0,350709323 | -3,184863073 | Olr59        | 0,196038336 |

**Supplementary table 2:** List of normalized gene expression profile of the 45 min IL-1 $\beta$  exposed JNK2 KD INS-1 cells, subtracted the gene expression pattern in IL-1 $\beta$  non-exposed JNK2 KD INS-1 cells to gene expression profile of 45 min IL-1 $\beta$  exposed NS INS-1 cells subtracted the gene expression pattern in the IL-1 $\beta$  non-exposed NS INS-1 cells.

| ID           | logFC        | AveExpr     | t           | P.Value     | adj.P.Val   | B            | Diff JNK3 genes | Fold Change |
|--------------|--------------|-------------|-------------|-------------|-------------|--------------|-----------------|-------------|
| 1375877_at   | 2,49432843   | 8,624173612 | 2,552801338 | 0,016507399 | 0,386447016 | -3,009933834 | Syt4            | 5,634659492 |
| 1384971_at   | 2,297018213  | 5,221109076 | 2,333604002 | 0,027126652 | 0,408715214 | -3,382082644 | Depcd7          | 4,914409963 |
| 1386965_at   | 2,156659677  | 7,330710513 | 2,39319975  | 0,023747528 | 0,397697565 | -3,282838606 | Lpl             | 4,458812945 |
| 1391573_at   | 2,065221679  | 7,474612044 | 2,35630412  | 0,025790985 | 0,405108087 | -3,344458413 | Tnfrsf21        | 4,184982758 |
| 1393584_at   | 2,048859735  | 7,547521036 | 2,180907384 | 0,03786804  | 0,423317957 | -3,629217296 | Tnfrsf21        | 4,137788014 |
| 1389199_at   | 1,970289668  | 7,164240328 | 4,288611774 | 0,000197454 | 0,33056701  | 0,362013392  | RGD1309079      | 3,91846787  |
| 1380443_at   | 1,965935452  | 7,265679744 | 3,134826622 | 0,004051348 | 0,35703421  | -1,942128939 | Pwp1            | 3,906659322 |
| 1382215_at   | 1,911202039  | 5,697247148 | 2,465846214 | 0,020150886 | 0,393279383 | -3,159867704 | RGD1562997      | 3,761224422 |
| 1387459_at   | 1,85774592   | 7,860843148 | 3,250534758 | 0,003026923 | 0,35703421  | -1,719195807 | Pkib            | 3,624409383 |
| 1369105_a_at | 1,837250262  | 8,459135664 | 3,052753419 | 0,004971085 | 0,35703421  | -2,098446793 | Pkib            | 3,573283208 |
| 1384882_at   | 1,783539083  | 8,151551996 | 2,931618209 | 0,006699466 | 0,38019467  | -2,326104506 | Hectd2          | 3,442696693 |
| 1390698_at   | 1,751416282  | 7,585271522 | 2,845489043 | 0,008259951 | 0,380993456 | -2,485544407 | MapKlip1l       | 3,366889288 |
| 1391544_at   | 1,70961008   | 6,576724828 | 2,425338781 | 0,022089382 | 0,395257589 | -3,228700623 | Pnla3           | 3,27072413  |
| 1378362_at   | 1,649837148  | 5,783758686 | 3,446189253 | 0,001835384 | 0,35703421  | -1,336347701 | C1ql3           | 3,137982155 |
| 1373223_at   | 1,633074613  | 8,069090440 | 2,113895852 | 0,043686971 | 0,43547049  | -3,734237538 | Fam171b         | 3,101733236 |
| 1383326_a_at | 1,632839568  | 9,288416461 | 3,232207486 | 0,003170683 | 0,35703421  | -1,754693415 | Pdcd4           | 3,10227941  |
| 1370517_at   | 1,624570333  | 7,025983949 | 3,501021726 | 0,001592879 | 0,35703421  | -1,227912354 | Nptx1           | 3,083503177 |
| 1384147_at   | 1,614245725  | 8,229598231 | 2,61013771  | 0,01449529  | 0,386447016 | -2,909516517 | Eif1a           | 3,061514943 |
| 1370234_at   | 1,5088816026 | 11,14440306 | 2,205143934 | 0,03594102  | 0,42025391  | -3,590704698 | Fn1             | 3,001775381 |
| 1379482_at   | 1,584842709  | 5,838486177 | 2,085715788 | 0,046363271 | 0,439384818 | -3,777744634 | Tm6sf1          | 2,999750909 |
| 1392818_at   | 1,523754811  | 9,466796717 | 3,440685736 | 0,001861612 | 0,35703421  | -1,34720598  | Gas5            | 2,875384347 |
| 1377089_a_at | 1,501426046  | 9,475484708 | 2,2972155   | 0,02939953  | 0,415762301 | -3,44192828  | Tspan5          | 2,831224293 |
| 1390458_at   | 1,459379606  | 5,430770545 | 2,185099416 | 0,037528244 | 0,422332804 | -3,622575863 | LOC100362458    | 2,749900857 |
| 1370781_a_at | 1,452169019  | 8,240116555 | 2,44410208  | 0,021171107 | 0,394076281 | -3,196898805 | Kncip1          | 2,736191147 |
| 1379612_at   | 1,424002224  | 8,157380902 | 2,394660814 | 0,023669742 | 0,397421884 | -3,280386713 | MapK8           | 2,683288586 |
| 1393952_at   | 1,419064234  | 6,62938367  | 2,412673671 | 0,022729714 | 0,396822987 | -3,250085666 | Ccdc68          | 2,67412005  |
| 1393707_at   | 1,418314251  | 8,765720368 | 2,791710535 | 0,009402021 | 0,383370555 | -2,583992214 | Bcl2l2          | 2,672730274 |
| 1384742_at   | 1,411907315  | 5,703594938 | 3,520026645 | 0,001516318 | 0,35703421  | -1,190225502 | Atrx            | 2,66088713  |
| 1374400_at   | 1,410836119  | 9,120140554 | 3,82845389  | 0,000675594 | 0,35703421  | -0,572485497 | Efr3a           | 2,658912164 |
| 1372440_at   | 1,403807024  | 8,259707802 | 2,890853846 | 0,007399619 | 0,380993456 | -2,401830339 | Serpine2        | 2,645988927 |
| 1387662_at   | 1,40347539   | 5,462116709 | 2,359527626 | 0,025606255 | 0,404682083 | -3,339097737 | Syt4            | 2,64538076  |
| 1393220_at   | 1,398224076  | 6,261976799 | 2,485023866 | 0,019288832 | 0,393279383 | -3,12705176  | Armrc8          | 2,635769252 |
| 1390777_at   | 1,383126412  | 8,202655986 | 2,982083362 | 0,005919513 | 0,371192657 | -2,231726984 | Scsdl           | 2,608330008 |
| 1388628_at   | 1,381061431  | 9,783203001 | 2,296898656 | 0,029420058 | 0,415762301 | -3,442446818 | Tmed3           | 2,604599283 |
| 1379027_at   | 1,375624384  | 7,620515633 | 2,943420149 | 0,00650878  | 0,378175195 | -2,304094632 | Wwv1            | 2,594081871 |
| 1373350_at   | 1,373359994  | 7,693985858 | 3,007186433 | 0,005564443 | 0,371110392 | -2,1845295   | Psp1            | 2,59073238  |
| 1379314_at   | 1,361471707  | 8,907352521 | 2,439739757 | 0,021381416 | 0,394076281 | -3,204305188 | Ppp3cb          | 2,5694716   |
| 1383736_at   | 1,354818727  | 7,36121149  | 2,42580392  | 0,022066183 | 0,395069793 | -3,227913988 | Elavl2          | 2,557649776 |
| 1384202_at   | 1,351580032  | 9,693378665 | 2,442827225 | 0,021232371 | 0,394076281 | -3,199604650 | Tesc            | 2,551914568 |
| 1390272_at   | 1,348092838  | 7,145500347 | 2,746531922 | 0,010474635 | 0,385404569 | -2,666004932 | DpH5            | 2,545753685 |
| 1398217_at   | 1,336959602  | 6,065479288 | 2,983186878 | 0,005903462 | 0,371192657 | -2,229655659 | Zbtb41          | 2,526183785 |
| 1393612_a_at | 1,324792142  | 4,271547706 | 2,249888532 | 0,032613747 | 0,416147597 | -3,518884998 | Depcd7          | 2,504967994 |
| 1395455_at   | 1,322012433  | 9,033135941 | 3,295235522 | 0,002702097 | 0,35703421  | -1,632338513 | Hnrmph3         | 2,500146152 |
| 1393613_at   | 1,310620779  | 8,246782226 | 3,474267197 | 0,001707047 | 0,35703421  | -1,280877891 | Zfp621          | 2,4804825   |
| 1385916_at   | 1,307749205  | 4,171838432 | 3,59593043  | 0,001244653 | 0,35703421  | -1,039215283 | LOC686240       | 2,475550201 |
| 1367930_at   | 1,278581977  | 9,635420002 | 2,903773501 | 0,007170548 | 0,380993456 | -2,377880646 | Gap43           | 2,42600408  |
| 1385639_at   | 1,27645289   | 8,333683541 | 3,642687543 | 0,001101543 | 0,35703421  | -0,948527477 | Casp8ap2        | 2,422426495 |
| 1383336_at   | 1,266173459  | 8,220510989 | 3,764294284 | 0,000800351 | 0,35703421  | -0,701805251 | Pnn             | 2,405227667 |
| 1388928_at   | 1,260401641  | 6,087069803 | 2,744237909 | 0,010532051 | 0,385404569 | -2,670151925 | CfI2            | 2,395624249 |
| 1383023_at   | 1,249620352  | 5,123981602 | 2,39605195  | 0,023595895 | 0,397107506 | -3,278051345 | Ube2h           | 2,377884828 |
| 1373022_at   | 1,244714025  | 10,53779405 | 2,254142112 | 0,032312385 | 0,416147597 | -3,512009701 | Rab1a           | 2,369715763 |
| 1396315_at   | 1,243422373  | 7,190995457 | 3,731817523 | 0,000871826 | 0,35703421  | -0,767122918 | Ccdc112         | 2,367595095 |
| 1382079_at   | 1,234214974  | 6,739792252 | 2,381398652 | 0,024384438 | 0,401002921 | -3,302610041 | MapK8           | 2,352533023 |
| 1391022_at   | 1,231525242  | 8,278680222 | 2,744440559 | 0,010526967 | 0,385404569 | -2,669785653 | Lamb3           | 2,348151093 |
| 1387112_at   | 1,222354316  | 6,047872504 | 2,469024287 | 0,02000562  | 0,393279383 | -3,154439555 | Plp1            | 2,333271705 |
| 1381206_at   | 1,220041122  | 4,080408668 | 2,470990798 | 0,019916216 | 0,393279383 | -3,151078753 | Plcx2           | 2,329533573 |
| 1378936_at   | 1,203341518  | 8,162094214 | 3,844906996 | 0,000646802 | 0,35703421  | -0,592967175 | Cstf2           | 2,302724024 |
| 1373249_at   | 1,19588721   | 8,573630544 | 2,836685739 | 0,008437488 | 0,380993456 | -2,501719638 | Ubl4a           | 2,290856689 |
| 1382161_at   | 1,195637098  | 7,729757955 | 3,241104825 | 0,003100091 | 0,35703421  | -1,737468832 | Mphosph10       | 2,290459572 |
| 1372133_at   | 1,184700879  | 10,2561388  | 2,719507423 | 0,011170046 | 0,385404569 | -2,714749929 | Rras2           | 2,273162591 |
| 1377474_at   | 1,182195643  | 7,079784239 | 2,193096842 | 0,036887572 | 0,421363014 | -3,609882486 | Abhd13          | 2,269218677 |
| 1392211_at   | 1,177644937  | 7,3802041   | 2,68099161  | 0,012236148 | 0,385404569 | -2,783805725 | Sec24b          | 2,262072136 |
| 1383768_at   | 1,167534491  | 7,276327115 | 2,192840638 | 0,036907943 | 0,421363014 | -3,610289597 | Elavl2          | 2,246274891 |
| 1393684_at   | 1,165566751  | 8,312076574 | 2,493777692 | 0,018906746 | 0,393279383 | -3,112024653 | Hells           | 2,243213212 |
| 1382058_at   | 1,163970812  | 9,498439684 | 3,059331053 | 0,004890583 | 0,35703421  | -2,085978077 | Rras2           | 2,240733095 |
| 1385061_at   | 1,158772865  | 7,961771861 | 2,846785103 | 0,008234113 | 0,380993456 | -2,483161076 | Tmem229a        | 2,232674389 |
| 1394029_at   | 1,158075924  | 7,836722589 | 2,59630044  | 0,016248787 | 0,386447016 | -2,98037573  | Vma21           | 2,231596083 |
| 1369886_a_at | 1,151105294  | 5,843883686 | 2,054689719 | 0,049477327 | 0,442806641 | -3,82518536  | Cabp1           | 2,220839748 |
| 1374932_at   | 1,151056157  | 9,201785263 | 3,351797469 | 0,026051286 | 0,406453982 | -3,351945524 | LOC100361444    | 2,220764109 |
| 1377503_at   | 1,147320032  | 7,463773477 | 3,494634042 | 0,001619445 | 0,35703421  | -1,145056751 | Rick2           | 2,215020471 |
| 1378081_at   | 1,146583697  | 6,355723561 | 2,994093872 | 0,005747025 | 0,371110392 | -2,209165849 | LOC100912462    | 2,213890238 |
| 1392449_at   | 1,144142774  | 9,926738638 | 5,103885681 | 2,16E-05    | 0,27773779  | 2,013265162  | Rad18           | 2,210147682 |
| 1398706_at   | 1,14196788   | 7,486201775 | 2,610820948 | 0,014426511 | 0,386447016 | -2,908312722 | LOC100909675    | 2,206818347 |
| 1388661_at   | 1,137548529  | 6,711707755 | 2,651909733 | 0,013103321 | 0,385404569 | -2,835614787 | Mtsp1           | 2,20066863  |
| 1394567_at   | 1,133798565  | 9,39057544  | 2,220796946 | 0,03474394  | 0,417971197 | -3,565685269 | Qsox2           | 2,194357468 |
| 1389362_at   | 1,131242534  | 7,334257882 | 2,167228701 | 0,038996078 | 0,426622475 | -3,65083031  | Ptpn3           | 2,190473154 |
| 1398424_at   | 1,125851655  | 10,30752563 | 2,908756172 | 0,007084009 | 0,380993456 | -2,368631464 | Wsb2            | 2,182303348 |
| 1382428_at   | 1,119409442  | 6,94372164  | 2,791310373 | 0,009411051 | 0,383370555 | -2,584721442 | Tasp1           | 2,172580212 |

Supplementary table 3

|              |              |             |              |             |             |              |              |             |
|--------------|--------------|-------------|--------------|-------------|-------------|--------------|--------------|-------------|
| 1387116_at   | 1,118546975  | 9,517497028 | 2,149858577  | 0,04047187  | 0,428690284 | -3,678146893 | Dnajb9       | 2,171281796 |
| 1389228_at   | 1,116542985  | 9,10210877  | 2,413449675  | 0,022689996 | 0,396822987 | -3,248777273 | Fam136a      | 2,168267849 |
| 1393892_at   | 1,114843395  | 7,550520391 | 2,443891335  | 0,021181224 | 0,394076281 | -3,197256785 | RGD1306625   | 2,165714989 |
| 1389918_at   | 1,105198184  | 8,591880517 | 3,283656145  | 0,002782864 | 0,35703421  | -1,654875245 | LOC100360205 | 2,151284284 |
| 1383396_at   | 1,105147705  | 9,436116572 | 2,40067798   | 0,02335184  | 0,397107506 | -3,270279626 | Fndc3a       | 2,151209013 |
| 1379825_at   | 1,104701659  | 9,141009922 | 2,572206663  | 0,015782293 | 0,386447016 | -2,976802662 | Poc1b        | 2,150544014 |
| 1387812_at   | 1,103343421  | 8,03025528  | 2,293671382  | 0,029629892 | 0,415762301 | -3,447725942 | Pcsk6        | 2,148520318 |
| 1381144_at   | 1,094699004  | 6,929857964 | 2,404756658  | 0,023138582 | 0,397107506 | -3,263420102 | Impad1       | 2,135685192 |
| 1398300_at   | 1,093965094  | 9,183934433 | 2,223670157  | 0,034527978 | 0,417971197 | -3,561080422 | Atp1b3       | 2,134599029 |
| 1380619_at   | 1,093466822  | 7,876912251 | 2,416144862  | 0,022552543 | 0,396822987 | -3,244231092 | RGD1305537   | 2,133861917 |
| 1383327_at   | 1,091205261  | 8,808104799 | 2,554946554  | 0,016425749 | 0,386447016 | -3,006198533 | Pdcd4        | 2,130519507 |
| 1371094_at   | 1,086806462  | 6,812404016 | 3,009512184  | 0,005532592 | 0,371110392 | -2,180148509 | Lhx2         | 2,124033414 |
| 1381906_at   | 1,085843077  | 7,691931895 | 2,252920676  | 0,032398664 | 0,416147597 | -3,513984818 | Tpd52        | 2,122615527 |
| 1376737_at   | 1,079474825  | 10,42141522 | 2,757023256  | 0,010215773 | 0,385404569 | -2,647017725 | LOC100912041 | 2,113266662 |
| 1378634_at   | 1,074908889  | 6,713924393 | 3,114748742  | 0,00426001  | 0,35703421  | -1,980515082 | Hdac8        | 2,106589044 |
| 1377836_at   | 1,066235324  | 6,521445635 | 3,295675207  | 0,002699075 | 0,35703421  | -1,631482261 | Zfp280d      | 2,093962091 |
| 1393350_at   | 1,061815377  | 5,117404053 | 2,382601246  | 0,024318826 | 0,401002921 | -3,300597893 | LOC100911349 | 2,087556691 |
| 1391432_at   | 1,056186556  | 8,513508722 | 2,837455301  | 0,008421826 | 0,380993456 | -2,500306562 | Wdr75        | 2,079427745 |
| 1398841_at   | 1,053550949  | 12,34361563 | 2,285313821  | 0,030179614 | 0,415762301 | -3,461375619 | Rab1a        | 2,075632382 |
| 1374111_at   | 1,051845042  | 8,171467725 | 3,602151808  | 0,001224616 | 0,35703421  | -1,026804694 | Pnn          | 2,073179512 |
| 1393251_at   | 1,049051922  | 9,503481764 | 2,13737361   | 0,041563256 | 0,432733747 | -3,697691021 | Arl10        | 2,06916963  |
| 1374425_at   | 1,047573205  | 7,467267663 | 2,47697193   | 0,019646551 | 0,393279383 | -3,14084751  | Tle1         | 2,067049883 |
| 1368053_at   | 1,047155234  | 6,607378336 | 2,285149208  | 0,030190534 | 0,415762301 | -3,461644155 | Pard3        | 2,066451114 |
| 1386910_a_at | 1,045322231  | 8,693441915 | 2,12973293   | 0,042244068 | 0,434107442 | -3,709614459 | Apex1        | 2,06382727  |
| 1395696_at   | 1,043719437  | 6,296471949 | 2,510163907  | 0,018210224 | 0,392844707 | -3,083815571 | Yae1d1       | 2,061535689 |
| 1398599_at   | 1,043087786  | 7,990591525 | 2,155248344  | 0,040008688 | 0,426961671 | -3,669866378 | Stt3a        | 2,06063329  |
| 1373416_at   | 1,042904645  | 9,471749592 | 2,057020679  | 0,049237096 | 0,442806641 | -3,821638119 | Fndc3b       | 2,060371723 |
| 1387521_at   | 1,042667907  | 9,125036282 | 2,41361048   | 0,022681774 | 0,396822987 | -3,248506114 | Pdcd4        | 2,060033655 |
| 1397886_at   | 1,039324352  | 6,792319495 | 2,058463203  | 0,049088946 | 0,442806641 | -3,819441508 | Zc3h8        | 2,055264899 |
| 1374879_x_at | 1,038940346  | 9,125003757 | 2,921195774  | 0,006872253 | 0,380993456 | -2,345509862 | Larp4b       | 2,054717916 |
| 1378930_a_at | 1,030550062  | 6,942302175 | 2,304104539  | 0,028956397 | 0,415762301 | -3,430642921 | LOC100912518 | 2,04280297  |
| 1374793_at   | 1,026665678  | 8,204496023 | 2,663862768  | 0,012740183 | 0,385404569 | -2,814355701 | Wdr3         | 2,037310224 |
| 1388015_at   | 1,025893872  | 4,572536585 | 2,185276422  | 0,037513957 | 0,422332804 | -3,622295249 | Ptprz1       | 2,036220604 |
| 1374389_at   | 1,024215173  | 8,21670729  | 2,843129618  | 0,008307185 | 0,380993456 | -2,489881888 | Gucy1b3      | 2,033852666 |
| 1386982_at   | 1,023049356  | 8,390237487 | 3,883762466  | 0,000583497 | 0,35703421  | -0,460736951 | Mgat2        | 2,032209808 |
| 1390507_at   | 1,019194685  | 10,21424128 | 3,113370581  | 0,004274704 | 0,35703421  | -1,983146552 | Isg20        | 2,026787827 |
| 1376719_at   | 1,016690412  | 6,350546183 | 2,512609867  | 0,01810831  | 0,392618461 | -3,079595934 | Tmem38b      | 2,023272181 |
| 1393753_at   | 1,012721026  | 7,650165503 | 2,943400504  | 0,006509093 | 0,378175195 | -2,304131299 | Nudcd1       | 2,017713065 |
| 1376704_a_at | 1,009729748  | 8,581853644 | 2,630428697  | 0,013780287 | 0,386447016 | -2,873695119 | Ndnf2        | 2,013533881 |
| 1384997_at   | 1,005670494  | 7,520168601 | 2,229639105  | 0,034083486 | 0,417615038 | -3,551501884 | Aen          | 2,007876443 |
| 1374249_at   | 1,00529757   | 7,273520667 | 2,46379238   | 0,02024528  | 0,393279383 | -3,163373524 | Syne4        | 2,007357491 |
| 1393780_at   | 1,004125033  | 7,834594587 | 3,336596121  | 0,002431642 | 0,35703421  | -1,551634674 | Zfp131       | 2,005726693 |
| 1381205_at   | 1,003945536  | 6,348050642 | 2,443778814  | 0,021186627 | 0,394076281 | -3,197447911 | Snapc5       | 2,005477161 |
| 1389747_at   | 1,00249801   | 7,256282164 | 2,451276975  | 0,020829333 | 0,394062166 | -3,184700575 | Slc26a8      | 2,003465976 |
| 1376893_at   | -1,029523018 | 10,35671926 | -3,26765548  | 0,002898304 | 0,35703421  | -1,685974713 | Nrsn1        | 0,489872083 |
| 1375788_at   | -1,032692571 | 6,03374311  | -2,90436478  | 0,007160226 | 0,380993456 | -2,376783438 | Rpl7         | 0,488797032 |
| 1398289_a_at | -1,050972675 | 7,028917451 | -2,51761697  | 0,017901324 | 0,39248496  | -3,070950796 | Chrhr1       | 0,482642654 |
| 1372858_at   | -1,083928765 | 4,69563409  | -2,218815952 | 0,0348933   | 0,417971197 | -3,568857946 | LOC100911740 | 0,471742418 |
| 1379863_at   | -1,091019009 | 7,314776614 | -2,120252214 | 0,043102654 | 0,435210858 | -3,724369628 | Kcnd2        | 0,469429688 |
| 1386754_at   | -1,140537457 | 8,123749323 | -2,288729681 | 0,029953827 | 0,415762301 | -3,455800546 | Trim14       | 0,453590567 |
| 1367892_at   | -1,180144502 | 7,968016226 | -2,806001937 | 0,009084814 | 0,383370555 | -2,557916054 | Pdk2         | 0,441307294 |
| 1387476_at   | -1,189058234 | 7,224494546 | -2,477018496 | 0,01964465  | 0,393279383 | -3,140767799 | Kcnd2        | 0,438589071 |
| 1387776_at   | -1,199965646 | 7,296537955 | -2,122995297 | 0,042852651 | 0,435082639 | -3,720105003 | Tgm2         | 0,435285703 |
| 1373161_at   | -1,210269784 | 10,92635004 | -3,224817717 | 0,003230486 | 0,35703421  | -1,768987234 | Tmem98       | 0,432187789 |
| 1389474_at   | -1,243447234 | 9,114820971 | -2,160232824 | 0,039584563 | 0,426622475 | -3,661849599 | Myliip       | 0,42236224  |
| 1373108_at   | -1,344391652 | 8,295129885 | -3,099316681 | 0,004427334 | 0,35703421  | -2,009956009 | Ppp1r3c      | 0,393820017 |
| 1387981_at   | -2,179691141 | 6,285091041 | -2,272548768 | 0,031037093 | 0,416147597 | -3,48216351  | Olr59        | 0,220722997 |

**Supplementary table 3:** List of normalized gene expression profile of the 45 min IL-1 $\beta$  exposed JNK1KD INS-1 cells, subtracted the gene expression pattern in IL-1 $\beta$  non-exposed JNK1 KD INS-1 cells to gene expression profile of 45 min IL-1 $\beta$  exposed NS INS-1 cells subtracted the gene expression pattern in the IL-1 $\beta$  non-exposed NS INS-1 cells.
